# Supplementary figures and images for: Synthesis of meso-β doubly linked porphyrin tapesElectronic supplementary information (ESI) available: 1H NMR spectra. See http://www.rsc.org/suppdata/cc/b3/b302032k/
Source: Royal Society of Chemistry journal article supplement (doi:10.1039/b302032k), 2003-04-07

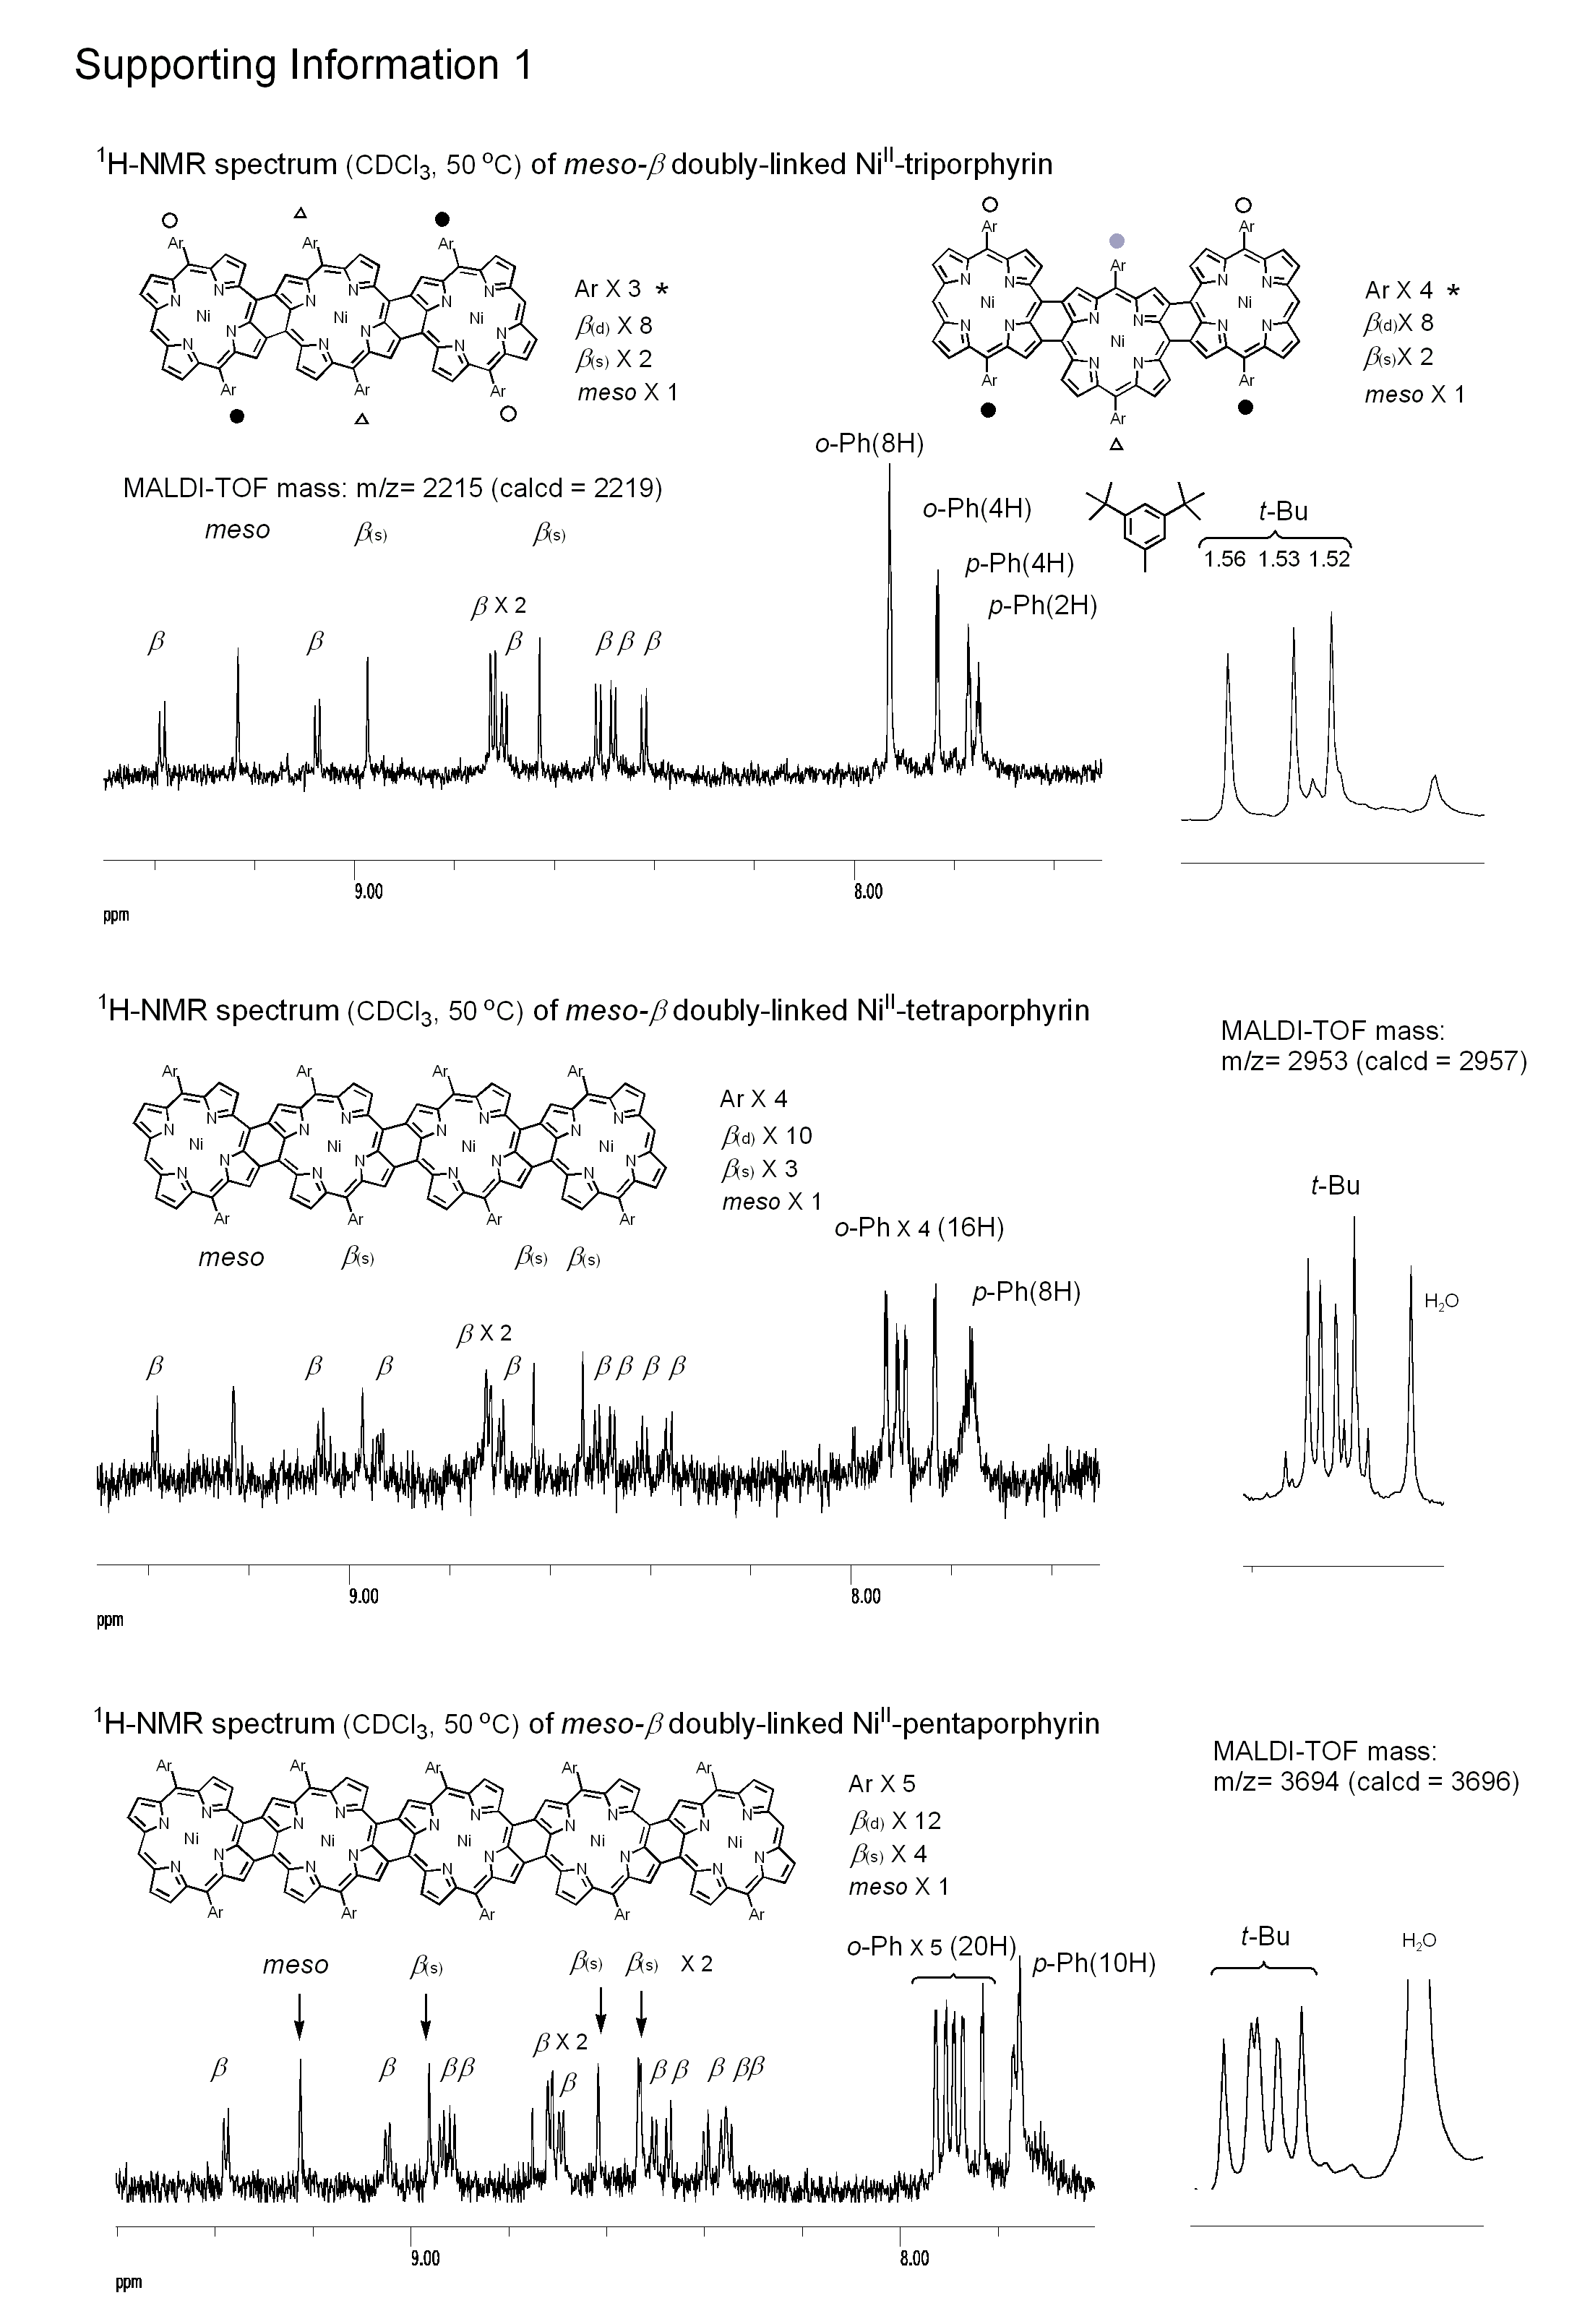

Supplement: b302032k.doc [file b302032k.doc]
